# Supplementary material
Source: PubMed Central journal article supplement (PMC5006679)
Supplement: NIHMS810164-supplement-Supplementary_Data_Table_1.pdf [file NIHMS810164-supplement-Supplementary_Data_Table_1.pdf]

**Supplemental Data Table 1. PV loop assessment**

| Treatment                            | IV Placebo/ TE Placebo |                  | IV Placebo/ TE MSC |                  | IV MSC/ TE Placebo |                 | IV MSC/ TE MSC   |                  | Baseline | Dobutamine |
|--------------------------------------|------------------------|------------------|--------------------|------------------|--------------------|-----------------|------------------|------------------|----------|------------|
|                                      | Pre-Dobutamine         | Dobutamine       | Pre-Dobutamine     | Dobutamine       | Pre-Dobutamine     | Dobutamine      | Pre-Dobutamine   | Dobutamine       | p=       | p=         |
| <b>Heart Rate (BPM)</b>              | 83 +/-5                | 140 +/-8         | 88 +/-5            | 134 +/-10        | 86 +/-5            | 135 +/-8        | 86 +/-5          | 140 +/-8         | 0.91     | 0.94       |
| <b>End Systolic Pressure (mmHg)</b>  | 66.3 +/-3.3            | 97.9 +/-4.8      | 70.1 +/-3.6        | 104 +/-5.9       | 65.0 +/-3.3        | 96.6 +/-4.8     | 63.3 +/-3.3      | 64.5 +/-4.8      | 0.55     | 0.65       |
| <b>End Diastolic Pressure (mmHg)</b> | 5.5 +/-1.3             | 4.4 +/-1.4       | 5.7 +/-1.4         | 3.8 +/-1.7       | 2.9 +/-1.3         | 1.9 +/-1.4      | 3.5 +/-1.3       | 2.0 +/-1.4       | 0.34     | 0.55       |
| <b>Pmax (mmHg)</b>                   | 70.5 +/-3.2            | 106.7 +/-5.4     | 74.1 +/-3.5        | 111.7 +/-6.6     | 69.0 +/-3.2        | 108.4 +/-5.4    | 68.3 +/-3.2      | 107 +/-5.4       | 0.62     | 0.94       |
| <b>Pmin (mmHg)</b>                   | -0.7 +/-0.9            | -2.4 +/-1.2      | -0.1 +/-1.0        | -2.1 +/-1.4      | -1.4 +/-0.9        | -3.1 +/-1.2     | -1.8 +/-0.9      | -2.3 +/-1.2      | 0.58     | 0.95       |
| <b>dPpmax (mmHg/sec)</b>             | 822.8 +/-85.3          | 2389.2 +/-178.8  | 938.5 +/-93.4      | 2448.8 +/-219.0  | 918.4 +/-85.3      | 2463.2 +/-178.8 | 916 +/-85.3      | 2530.4 +/-178.8  | 0.78     | 0.96       |
| <b>dPmin (mmHg/sec)</b>              | -856.5 +/-60.2         | -1532.8 +/-116.3 | -901.6 +/-66.0     | -1594.1 +/-142.4 | -828.6 +/-60.2     | -1406 +/-116.3  | 870 +/-60.2      | -1541.5 +/-116.3 | 0.87     | 0.74       |
| <b>Vmax (mL)</b>                     | 138.4 +/-13.4          | 114.6 +/-14.6    | 133 +/-14.6        | 97.4 +/-17.9     | 108 +/-13.4        | 111.8 +/-14.6   | 123 +/-13.4      | 118.3 +/-14.6    | 0.42     | 0.83       |
| <b>Vmin (mL)</b>                     | 71.5 +/-8.9            | 55.2 +/-8.4      | 81.5 +/-9.7        | 57.1 +/-10.3     | 52.2 +/-8.9        | 47.7 +/-8.4     | 62.3 +/-8.9      | 45.1 +/-8.4      | 0.17     | 0.75       |
| <b>End Systolic Volume (mL)</b>      | 85.1 +/-10.5           | 68.8 +/-8.5      | 87.6 +/-11.5       | 61.2 +/-10.4     | 59.4 +/-10.5       | 56.3 +/-8.5     | 72.8 +/-10.5     | 55.9 +/-8.5      | 0.25     | 0.69       |
| <b>End Diastolic Volume (mL)</b>     | 133.1 +/-10.8          | 108.3 +/-13.7    | 126.3 +/-11.8      | 95.2 +/-16.7     | 100.0 +/-10.8      | 101.1 +/-13.7   | 118 +/-10.8      | 107.6 +/-13.7    | 0.19     | 0.92       |
| <b>Stroke Volume (mL)</b>            | 48.0 +/-5.1            | 39.6 +/-9.0      | 38.7 +/-5.6        | 33.9 +/-11.1     | 40.5 +/-5.1        | 44.8 +/-9.0     | 45.3 +/-5.1      | 51.8 +/-9.0      | 0.58     | 0.62       |
| <b>Cardiac Output (L/min)</b>        | 4.0 +/-0.5             | 5.3 +/-0.1       | 3.4 +/-0.6         | 4.4 +/-0.2       | 3.5 +/-0.5         | 6.0 +/-0.1      | 3.9 +/-0.5       | 7.6 +/-0.1       | 0.81     | 0.55       |
| <b>Ejection Fraction (%)</b>         | 36.1 +/-5.2            | 34.8 +/-5.2      | 31.4 +/-5.7        | 35.7 +/-6.4      | 44.0 +/-5.2        | 46.6 +/-5.2     | 38.4 +/-5.2      | 46.1 +/-5.2      | 0.44     | 0.28       |
| <b>Stroke Work (mJoules)</b>         | 375.7 +/-56.8          | 489.8 +/-108.5   | 306 +/-62.3        | 385.8 +/-132.9   | 321 +/-56.8        | 542.8 +/-108.5  | 350.1 +/-56.8    | 617.1 +/-108.5   | 0.84     | 0.59       |
| <b>MaxPwr (mWatt)</b>                | 5513.2 +/-1231.9       | 29573 +/-4810    | 7901 +/-1349.5     | 35955 +/-5892    | 7143.1 +/-1231.9   | 35029 +/-4810   | 6993.2 +/-1231.9 | 25934 +/-4810    | 0.61     | 0.76       |
| <b>piPwr (mWatt/mL)</b>              | 0.3 +/-0.2             | 2.9 +/-1.1       | 0.5 +/-0.2         | 4.5 +/-1.3       | 0.9 +/-0.2         | 4.7 +/-1.1      | 0.6 +/-0.2       | 4.2 +/-1.1       | 0.16     | 0.65       |

|                          |                |                  |                |                 |                |                 |                |                |              |      |
|--------------------------|----------------|------------------|----------------|-----------------|----------------|-----------------|----------------|----------------|--------------|------|
| <b>EA</b><br>(mmHg/mL)   | 1.5 +/-0.2     | 3.3 +/-0.5       | 1.9 +/-0.2     | 3.3 +/-0.6      | 1.8 +/-0.2     | 2.8 +/-0.5      | 1.5 +/-0.2     | 2.3 +/-0.5     | 0.37         | 0.54 |
| <b>PVA</b><br>(mJoules)) | 790.8 +/-141.7 | 1025.6 +/-165.8  | 604.6 +/-173.5 | 657.4 +/-203.1  | 528.5 +/-141.7 | 936.2 +/-165.8  | 630.1 +/-141.7 | 909.5 +/-165.8 | 0.62         | 0.57 |
| <b>PE (mJoules)</b>      | 415.1 +/-99.1  | 535.8 +/-104.6   | 303.0 +/-121.4 | 271.5 +/-128.1  | 206.9 +/-99.1  | 393.4 +/-104.6  | 280.0 +/-99.1  | 459.1 +/-104.6 | 0.53         | 0.45 |
| <b>Eff (%)</b>           | 55.6 +/-10.6   | 51.8 +/-6.3      | 63.0 +/-13.0   | 66.8 +/-7.8     | 67.0 +/-10.6   | 56.7 +/-6.3     | 68.6 +/-10.6   | 59.5 +/-6.3    | 0.82         | 0.52 |
| <b>TauW (msec)</b>       | 35.7 +/-5.6    | 20.6 +/-3.0      | 30.3 +/-6.1    | 25.2 +/-3.7     | 38.7 +/-5.6    | 22.7 +/-3.0     | 34.7 +/-5.6    | 16.7 +/-3.0    | 0.78         | 0.33 |
| <b>TauL (msec)</b>       | 108.9 +/-27.0  | 30.5 +/-21.1     | 100.9 +/-27.0  | 85.8 +/-23.6    | 92.2 +/-24.7   | 61.9 +/-19.3    | 51.2 +/-24.7   | 41.5 +/-23.6   | 0.40         | 0.36 |
| <b>TauG (msec)</b>       | 125.9 +/-56.7  | 6115.5 +/-2987.7 | 70.5 +/-62.2   | 99.89 +/-3659.1 | 171.5 +/-56.7  | 190.4 +/-2987.7 | 135.7 +/-56.7  | 68.7 +/-2987.7 | 0.69         | 0.43 |
| <b>TauM (msec)</b>       | 65.1 +/-16.7   | 51.1 +/-5.0      | 118.8 +/-18.3  | 60.8 +/-6.1     | 75.3 +/-16.7   | 55.3 +/-5.0     | 60.9 +/-16.7   | 51.3 +/-5.0    | 0.12         | 0.69 |
| <b>ESPVR</b>             | 1.2 +/-0.3     | 2.9 +/-0.7       | 2.0 +/-0.3     | 4.1 +/-0.8      | 3.2 +/-0.3     | 3.4 +/-0.7      | 1.7 +/-0.3     | 5.0 +/-0.7     | <b>0.001</b> | 0.22 |
| <b>EDPVR</b>             | 0.01 +/-0.003  | 0.02 +/-1.4      | 0.003 +/-0.005 | 0.01 +/-2.2     | 0.01 +/-0.005  | 0.01 +/-2.2     | 0.02 +/-0.004  | 2.2 +/-1.4     | 0.26         | 0.67 |
| <b>PRSW</b>              | 4.4 +/-5.4     | 8.5 +/-1.8       | 19.2 +/-5.9    | 9.7 +/-2.0      | 5.7 +/-5.4     | 9.2 +/-1.6      | 4.3 +/-5.4     | 8.7 +/-1.8     | 0.23         | 0.97 |
| <b>MaxdpEDV</b>          | 5.1 +/-3.8     | 34.2 +/-7.2      | 15.6 +/-4.2    | 40.8 +/-8.8     | 7.5 +/-3.8     | 27.9 +/-7.2     | 6.7 +/-3.8     | 43.2 +/-8.8    | 0.29         | 0.53 |
| <b>PVAEDV</b>            | 5.7 +/-5.2     | 8.5 +/-2.0       | 19.8 +/-5.7    | 16.2 +/-2.8     | 7.0 +/-5.2     | 9.0 +/-2.0      | 6.0 +/-5.2     | 10.7 +/-2.4    | 0.24         | 0.17 |
| <b>PVAESV</b>            | 13.6 +/-3.4    | 6.9 +/-1.9       | 17.2 +/-3.7    | 10.5 +/-2.4     | 13.2 +/-3.4    | 8.3 +/-1.9      | 12.7 +/-3.4    | 6.3 +/-2.1     | 0.81         | 0.58 |
| <b>E<sub>max</sub></b>   | 3.6 +/-1.7     | 5.7 +/-0.9       | 6.7 +/-1.9     | 5.7 +/-1.0      | 4.42 +/-1.7    | 5.8 +/-0.9      | 2.7 +/-1.7     | 6.6 +/-1.0     | 0.45         | 0.92 |

#### Journal of Cardiovascular Translational Research

#### Intravenous followed by Xray Fused with MRI Guided Transendocardial Mesenchymal Stem Cell Injection Improves Contractility Reserve in a Swine Model of Myocardial Infarction

Eric G. Schmuck PhD, Jill M. Koch PhD, Timothy A. Hacker PhD, Charles R. Hatt PhD, Michael T. Tomkowiak PhD, Karl K. Vigen PhD, Nicholas Hendren MD, Cathlyn Leitzke MS, Ying-qi Zhao PhD, Zhanhai Li PhD, John M. Centanni MS, Derek J. Hei PhD, Denise Schwahn DVM, PhD, Jaehyup Kim MD, Peiman Hematti MD, Amish N. Raval MD\*

\*Division of Cardiovascular Medicine, Department of Medicine, University of Wisconsin School of Medicine and Public Health, Madison, WI, USA, anr@medicine.wisc.edu
