# Supplementary material
Source: PubMed Central journal article supplement (PMC5006679)
Supplement: NIHMS810164-supplement-Supplementary_Data_Table_2.pdf [file NIHMS810164-supplement-Supplementary_Data_Table_2.pdf]

**Supplemental Data Table 2. Cardiac MRI Assessment**

| Time Point (Days post MI)          | Day 2       |             |             |             | Day 14      |              |             |             |
|------------------------------------|-------------|-------------|-------------|-------------|-------------|--------------|-------------|-------------|
|                                    | --          | -+          | +-          | ++          | --          | -+           | +-          | ++          |
| <b>Treatment</b>                   |             |             |             |             |             |              |             |             |
| <b>End Diastolic Volume (mL)</b>   | 77.3 +/-6.0 | 78.8 +/-6.5 | 75.4 +/-6.0 | 75.2 +/-6.0 | 80.9 +/-6.0 | 82.2 +/-6.5  | 72.1 +/-6.0 | 73.5 +/-6.0 |
| <b>End Systolic Volume (mL)</b>    | 55.5 +/-4.3 | 49.1 +/-4.7 | 43.9 +/-4.3 | 45.4 +/-4.3 | 49.0 +/-4.3 | 44.1 +/-4.7  | 33.6 +/-4.3 | 38.3 +/-4.3 |
| <b>Stroke Volume (mL)</b>          | 21.8 +/-3.3 | 29.6 +/-3.6 | 31.4 +/-3.3 | 29.8 +/-3.3 | 31.9 +/-3.3 | 38.2 +/-3.6  | 38.8 +/-3.3 | 35.2 +/-3.3 |
| <b>Cardiac Output (L/min)</b>      | 2.1 +/-0.3  | 3.2 +/-0.4  | 2.8 +/-0.3  | 2.4 +/-0.3  | 2.9 +/-0.3  | 4.4 +/-0.4   | 4.0 +/-0.3  | 3.6 +/-0.3  |
| <b>Ejection Fraction (%)</b>       | 27.7 +/-2.8 | 39.0 +/-3.1 | 42.0 +/-2.8 | 40.2 +/-2.8 | 39.2 +/-2.8 | 47.6 +/-3.1  | 53.9 +/-2.8 | 48.1 +/-2.8 |
| <b>Delta Ejection Fraction (%)</b> | 0           | 0           | 0           | 0           | 11.5 +/-2.5 | 8.6 +/-2.7   | 11.9 +/-2.5 | 8.0 +/-2.5  |
| <b>LV Mass End Diastolic (g)</b>   | 87.5 +/-5.8 | 94.7 +/-6.4 | 87.4 +/-5.8 | 86.1 +/-5.8 | 87.5 +/-5.8 | 97.5 +/-6.4  | 91.3 +/-5.8 | 82.9 +/-5.8 |
| <b>LV Mass End Systolic (g)</b>    | 89.5 +/-6.3 | 98.2 +/-6.9 | 90.2 +/-6.3 | 88.4 +/-6.3 | 91.7 +/-6.3 | 102.2 +/-6.9 | 95.3 +/-6.3 | 88.1 +/-6.3 |
| <b>Infarct Volume (mL)</b>         | 21.3 +/-1.3 | 17.3 +/-1.5 | 18.8 +/-1.3 | 16.5 +/-1.3 | 10.7 +/-1.3 | 8.9 +/-1.5   | 8.7 +/-1.3  | 8.3 +/-1.3  |
| <b>% LV infarcted</b>              | 24.6 +/-1.3 | 17.9 +/-1.5 | 21.6 +/-1.3 | 19.1 +/-1.3 | 12.5 +/-1.3 | 9.3 +/-1.5   | 9.5 +/-1.3  | 10.0 +/-1.3 |

**Time Point (Days post MI)****Day 55**

| <b>Treatment</b>                   | <b>--</b>    | <b>-+</b>    | <b>+-</b>    | <b>++</b>    | <b>p =</b> |
|------------------------------------|--------------|--------------|--------------|--------------|------------|
| <b>End Diastolic Volume (mL)</b>   | 106.2 +/-6.0 | 97.7 +/-6.5  | 92.0 +/-6.0  | 100.3 +/-6.0 | 0.92       |
| <b>End Systolic Volume (mL)</b>    | 56.0 +/-4.3  | 47.4 +/-4.7  | 40.6 +/-4.3  | 46.7 +/-4.3  | 0.99       |
| <b>Stroke Volume (mL)</b>          | 50.2 +/-3.3  | 50.3 +/-3.6  | 51.4 +/-3.3  | 53.6 +/-3.3  | 0.84       |
| <b>Cardiac Output (L/min)</b>      | 4.7 +/-0.3   | 5.3 +/-0.4   | 4.9 +/-0.3   | 5.2 +/-0.3   | 0.80       |
| <b>Ejection Fraction (%)</b>       | 47.0 +/-2.8  | 51.4 +/-3.1  | 56.3 +/-2.8  | 53.8 +/-2.8  | 0.88       |
| <b>Delta Ejection Fraction (%)</b> | 19.4 +/-2.5  | 12.5 +/-2.7  | 14.4 +/-2.5  | 13.6 +/-2.5  | 0.80       |
| <b>LV Mass End Diastolic (g)</b>   | 114.3 +/-5.8 | 123.9 +/-6.4 | 120.6 +/-5.8 | 113.5 +/-5.8 | 0.99       |
| <b>LV Mass End Systolic (g)</b>    | 122.2 +/-6.3 | 131.5 +/-6.9 | 125.8 +/-6.3 | 117.8 +/-6.3 | 0.99       |
| <b>Infarct Volume (mL)</b>         | 11.1 +/-1.3  | 11.6 +/-1.5  | 8.6 +/-1.3   | 8.6 +/-1.3   | 0.69       |
| <b>% LV infarcted</b>              | 9.8 +/-1.3   | 9.4 +/-1.5   | 7.2 +/-1.3   | 7.6 +/-1.3   | 0.35       |

**Journal of Cardiovascular Translational Research****Intravenous followed by Xray Fused with MRI Guided Transendocardial Mesenchymal Stem Cell Injection Improves Contractility Reserve in a Swine Model of Myocardial Infarction**

Eric G. Schmuck PhD, Jill M. Koch PhD, Timothy A. Hacker PhD, Charles R. Hatt PhD, Michael T. Tomkowiak PhD, Karl K. Vigen PhD, Nicholas Hendren MD, Cathlyn Leitzke MS, Ying-qi Zhao PhD, Zhanhai Li PhD, John M. Centanni MS, Derek J. Hei PhD, Denise Schwahn DVM, PhD, Jaehyup Kim MD, Peiman Hematti MD, Amish N. Raval MD\*

\*Division of Cardiovascular Medicine, Department of Medicine, University of Wisconsin School of Medicine and Public Health, Madison, WI, USA, anr@medicine.wisc.edu
