# Supplementary material
Source: PubMed Central journal article supplement (PMC5006679)
Supplement: NIHMS810164-supplement-Supplementary_Methods_Table_1.pdf [file NIHMS810164-supplement-Supplementary_Methods_Table_1.pdf]

**Supplemental Methods Table 1. Quantitative Histological Grading Scale**

|                    | <b>Myocardial infarct</b> | <b>Ventricular myocardial anisokaryosis</b> | <b>Left ventricular subepicardial fibrosis</b> | <b>Left ventricular myocardial fibrosis</b> |
|--------------------|---------------------------|---------------------------------------------|------------------------------------------------|---------------------------------------------|
| <b>Assessed on</b> | Trichrome, 4X             | H&E, 10X                                    | Trichrome, 4X                                  | Trichrome, 4X                               |
| <b>Grade 0</b>     | 0-5% of tissue            | Minimal                                     | 0-5% of subepicardium                          | None                                        |
| <b>Grade 1</b>     | 6-34% of tissue           | Mild                                        | 6-34% of subepicardium                         | Focal                                       |
| <b>Grade 2</b>     | 35-66% of tissue          | Moderate                                    | 35-66% of subepicardium                        | Multifocal                                  |
| <b>Grade 3</b>     | 67-95% of tissue          | Marked                                      | 67-95% of subepicardium                        | Multifocal coalescing                       |
| <b>Grade 4</b>     | 96-100% of tissue         | Severe                                      | 96-100% of subepicardium                       | Diffuse                                     |

|                    | <b>Left ventricular subendocardial fibrosis</b> | <b>Hemosiderophage foci (#)</b> | <b>Myocardial mineralization</b> | <b>Lymphocyte foci (#)</b> |
|--------------------|-------------------------------------------------|---------------------------------|----------------------------------|----------------------------|
| <b>Assessed on</b> | Trichrome, 4X                                   | H&E, 10X                        | H&E, 4X                          | H&E, 20X                   |
| <b>Grade 0</b>     | 0-5% of subendocardium                          |                                 | None                             |                            |
| <b>Grade 1</b>     | 6-34% of subendocardium                         |                                 | Focal                            |                            |
| <b>Grade 2</b>     | 35-66% of subendocardium                        |                                 | Multifocal                       |                            |
| <b>Grade 3</b>     | 67-95% of subendocardium                        |                                 | Multifocal coalescing            |                            |
| <b>Grade 4</b>     | 96-100% of subendocardium                       |                                 | Diffuse                          |                            |

|                    | <b>Myocardial hemorrhage</b> | <b>Epicardial fibrovascular tissue</b> | <b>Fatty infiltration</b> | <b>Granulomatous/histiocytic foci (#)</b> |
|--------------------|------------------------------|----------------------------------------|---------------------------|-------------------------------------------|
| <b>Assessed on</b> | H&E, 10X                     | Trichrome, 4X                          | H&E, 4X                   | H&E, 20X                                  |
| <b>Grade 0</b>     | None                         | None                                   | None                      |                                           |
| <b>Grade 1</b>     | Focal                        | Focal                                  | Focal                     |                                           |
| <b>Grade 2</b>     | Multifocal                   | Multifocal                             | Multifocal                |                                           |
| <b>Grade 3</b>     | Multifocal coalescing        | Multifocal coalescing                  | Multifocal coalescing     |                                           |
| <b>Grade 4</b>     | Diffuse                      | Diffuse                                | Diffuse                   |                                           |

Journal of Cardiovascular Translational Research

**Intravenous followed by Xray Fused with MRI Guided Transendocardial Mesenchymal Stem Cell Injection Improves Contractility Reserve in a Swine Model of Myocardial Infarction**

Eric G. Schmuck PhD, Jill M. Koch PhD, Timothy A. Hacker PhD, Charles R. Hatt PhD, Michael T. Tomkowiak PhD, Karl K. Vigen PhD, Nicholas Hendren MD, Cathlyn Leitzke MS, Ying-qi Zhao PhD, Zhanhai Li PhD, John M. Centanni MS, Derek J. Hei PhD, Denise Schwahn DVM, PhD, Jaehyup Kim MD, Peiman Hematti MD, Amish N. Raval MD\*

\*Division of Cardiovascular Medicine, Department of Medicine, University of Wisconsin School of Medicine and Public Health, Madison, WI, USA, anr@medicine.wisc.edu
