# Supplementary material
Source: PubMed Central journal article supplement (PMC5006679)
Supplement: NIHMS810164-supplement-Supplementary_Table_3.pdf [file NIHMS810164-supplement-Supplementary_Table_3.pdf]

**Supplemental Data table 3. Body and Organ Weights**

| Treatment                     | --            | -+             | +-             | ++             | p=   |
|-------------------------------|---------------|----------------|----------------|----------------|------|
| <b>Body weight (Kg)</b>       | 63.3 +/-1.7   | 65.7 +/- 3.0   | 65.7 +/-3.3    | 60.7 +/-1.3    | 0.43 |
| <b>Heart Wt (g)</b>           | 271.5 +/-11.3 | 275.4 +/-21.7  | 261.7 +/-14.8  | 232.7 +/-9.8   | 0.18 |
| <b>Lung Wt (g)</b>            | 415.7 +/-21.7 | 431.6 +/-21.3  | 466.8 +/-16.8  | 456.7 +/-14.2  | 0.21 |
| <b>Spleen Wt (g)</b>          | 244.2 +/-18.8 | 223.4 +/-56.1  | 226.5 +/-28.3  | 216.7 +/-46.8  | 0.96 |
| <b>Right Kidney Wt (g)</b>    | 106.5 +/-6.6  | 105.8 +/-8.5   | 113.5 +/-7.7   | 108.0 +/-6.4   | 0.87 |
| <b>Left Kidney Wt (g)</b>     | 108.7 +/-7.9  | 105.0 +/-5.8   | 115.2 +/-6.6   | 111.0 +/-9.1   | 0.82 |
| <b>Liver wt (g)</b>           | 1236 +/-60.6  | 1221.2 +/-56.5 | 1238.3 +/-71.9 | 1319.3 +/-73.8 | 0.72 |
| <b>Heart wt/body wt ratio</b> | 4.3 +/-0.1    | 4.2 +/-0.3     | 3.9 +/-0.1     | 3.8 +/-0.1     | 0.29 |

Journal of Cardiovascular Translational Research

**Intravenous followed by Xray Fused with MRI Guided Transendocardial Mesenchymal Stem Cell Injection Improves Contractility Reserve in a Swine Model of Myocardial Infarction**

Eric G. Schmuck PhD, Jill M. Koch PhD, Timothy A. Hacker PhD, Charles R. Hatt PhD, Michael T. Tomkowiak PhD, Karl K. Vigen PhD, Nicholas Hendren MD, Cathlyn Leitzke MS, Ying-qi Zhao PhD, Zhanhai Li PhD, John M. Centanni MS, Derek J. Hei PhD, Denise Schwahn DVM, PhD Jaehyup Kim MD, Peiman Hematti MD, Amish N. Raval MD\*

\*Division of Cardiovascular Medicine, Department of Medicine, University of Wisconsin School of Medicine and Public Health, Madison, WI, USA, anr@medicine.wisc.edu
